1 Research Article

2 Year-round dynamics of amplicon sequence variant communities differ among eukaryotes,

3 *Mimiviridae*, and prokaryotes in a coastal ecosystem

4

5 Florian Proding<sup>1</sup>, Hisashi Endo<sup>1</sup>, Yoshihito Takano<sup>2</sup>, Yanze Li<sup>1</sup>, Kento Tominaga<sup>3</sup>, Tatsuhiro

6 Isozaki<sup>3</sup>, Romain Blanc-Mathieu<sup>1,4</sup>, Yasuhiro Gotoh<sup>5</sup>, Hayashi Tetsuya<sup>5</sup>, Etsunori Taniguchi<sup>6</sup>.

7 Keizo Nagasaki<sup>2</sup>, Takashi Yoshida<sup>3</sup>, and Hiroyuki Ogata<sup>1\*</sup>

8

9 <sup>1</sup> Institute for Chemical Research, Kyoto University, Gokasho, Uji, Japan

10 <sup>2</sup> Faculty of Science and Technology, Kochi University, Nankoku, Kochi, Japan

11 <sup>3</sup> Graduate School of Agriculture, Kyoto University, Kitashirakawa-Oiwake, Sakyo-ku, Kyoto,  
12 Japan

13 <sup>4</sup> Laboratoire de Physiologie Cellulaire & Végétale, CEA, Univ. Grenoble Alpes, CNRS, INRA,  
14 IRIG, Grenoble, France

15 <sup>5</sup> Department of Bacteriology, Faculty of Medical Sciences, Kyushu University, Maidashi,  
16 Higashi-ku, Fukuoka, Japan;

17 <sup>6</sup> Kochi Prefectural Fisheries Research Institute, Susakishi, Kochi, Japan;

18

19 One sentence summary: A one year observation of coastal microbial communities revealed

20 similar but different community dynamics for eukaryotes, a group of large viruses, and

21 prokaryotes.

22

---

\* Corresponding author: Institute for Chemical Research, Kyoto University Uji, Kyoto 611-0011,

Japan; Tel: +81-774-38-3270; E-mail: [ogata@kuicr.kyoto-u.ac.jp](mailto:ogata@kuicr.kyoto-u.ac.jp)

## 23 **Abstract**

24 Coastal seawater is the habitat of different microbial communities. These communities  
25 are affected by seasonal environmental changes and fluctuating nutrient availability, as well as  
26 competitive and cooperative interspecific interactions. In this work, we investigated the seasonal  
27 dynamics of communities of eukaryotes, a major group of double-stranded DNA viruses  
28 infecting eukaryotes (i.e. *Mimiviridae*), as well as prokaryotes in the Uranouchi Inlet, Kochi,  
29 Japan. We performed metabarcoding using ribosomal RNA genes and the *Mimiviridae polB* gene  
30 as marker genes in 43 seawater samples collected during 20 months. Communities characterized  
31 by the compositions of amplicon sequence variants (ASVs) showed synchronic seasonal cycles  
32 for eukaryotes, *Mimiviridae*, and prokaryotes. However, the community dynamics showed  
33 intriguing differences in several aspects such as the recovery rate after a year. We further show  
34 that the differences in the community dynamics can be explained by differences in the  
35 recurrence/persistence levels of individual ASVs among eukaryotes, *Mimiviridae*, and  
36 prokaryotes. *Mimiviridae* ASVs were less persistent than eukaryotic ASVs, and prokaryotic  
37 ASVs were the most persistent. We argue that the differences in the specificity of interactions  
38 (i.e. virus-eukaryote vs prokaryote-eukaryote) as well as the survival strategies are at the origin  
39 of the distinct community dynamics among eukaryotes, *Mimiviridae*, and prokaryotes.

40

## 41 **Introduction**

42 Microbes – cellular microorganisms and viruses – in marine ecosystems are responsible for  
43 biogeochemical cycling (Not *et al.* 2012; Brum and Sullivan 2015; Fuhrman, Cram and  
44 Needham 2015), which is driven by diverse members of microbial communities. The  
45 compositions of microbial communities change over time and space in response to  
46 environmental factors and through species interactions. Therefore, to understand a marine  
47 ecosystem, it is fundamentally important to study the structures of microbial communities, their  
48 dynamics, and the mechanism that drives the change of microbial communities in the ecosystem.

49 Previous studies have explored the temporal dynamics of eukaryotic (Chen *et al.* 2017;  
50 Giner *et al.* 2019; Gran-Stadniczeňko *et al.* 2019a), prokaryotic (Gilbert *et al.* 2012; Fuhrman,  
51 Cram and Needham 2015; Milici *et al.* 2016; Sakami *et al.* 2016; Teeling *et al.* 2016; Ward *et al.*  
52 2017), both eukaryotic and prokaryotic (Bock *et al.* 2018; Chafee *et al.* 2018), and viral  
53 communities (Ignacio-Espinoza, Ahlgren and Fuhrman 2020). Other studies have investigated  
54 co-variations among these cellular communities (Needham and Fuhrman 2016; Martin-Platero *et*  
55 *al.* 2018; Santi *et al.* 2019) or cellular and viral communities (Chow and Fuhrman 2012;  
56 Needham *et al.* 2013; Pagarete *et al.* 2013; Johannessen *et al.* 2017; Arkhipova *et al.* 2018;  
57 Sandaa *et al.* 2018; Gran-Stadniczeňko *et al.* 2019b). Overall, these studies have revealed  
58 similarities and differences in community dynamics among different microbe groups. Yearly  
59 cycles and the recurrence of certain operational taxonomy units at 12-month intervals have been  
60 detected for eukaryotes in the north western Mediterranean Sea (Giner *et al.* 2019), prokaryotes  
61 in the English Channel (Gilbert *et al.* 2012; Fuhrman, Cram and Needham 2015), and small  
62 viruses at a near-coastal site of southern California (Ignacio-Espinoza, Ahlgren and Fuhrman  
63 2020) through long-term observations. A short-term study that compared prokaryotic and

64 eukaryotic communities in Massachusetts Bay revealed a higher rate of decline in community  
65 similarity for eukaryotes than for prokaryotes (Martin-Platero *et al.* 2018). Furthermore, changes  
66 in abiotic factors were found to have a lower impact on the eukaryotic community than on  
67 prokaryotic communities in the Mediterranean Sea (Giner *et al.* 2019).

68         In this study, we investigated the community structures of microbial eukaryotes, viruses  
69 in the family *Mimiviridae* (phylum *Nucleocytoviricota*), and prokaryotes in the Uranouchi Inlet  
70 in Kochi prefecture, Japan. The Uranouchi Inlet is a semi-enclosed, eutrophic inlet, which is  
71 located at the south eastern side of Shikoku Island, Japan. The climate of Shikoku Island is  
72 humid subtropical and shows clear seasonality, with contrasting high and low water temperatures  
73 in summer and winter, respectively. The contrasting seasons provide abiotic conditions that  
74 change throughout the year. The inlet is known for recurrent harmful blooms of eukaryotic  
75 microalgae including *Karenia mikimotoi* (Dinophyceae), *Chattonella* spp. (Raphidophyceae),  
76 and *Heterosigma akashiwo* (Raphidophyceae), which occasionally damage the local fishery and  
77 aquaculture. No previous studies have investigated the dynamics of the microbial eukaryotic  
78 community in this inlet.

79         Viruses are thought to be important top-down regulators of communities of  
80 microorganisms, including eukaryotes. For example, the collapse of eukaryotic phytoplankton  
81 blooms is associated with viruses (Tarutani, Nagasaki and Yamaguchi 2000; Tomaru *et al.* 2004;  
82 Lehahn *et al.* 2014; Moniruzzaman *et al.* 2014). The sudden increase of virions during the period  
83 of bloom decline suggests that viruses are top-down regulators of phytoplankton populations  
84 (Nagasaki *et al.* 2003; Kuhlisch *et al.* 2020). The family *Mimiviridae* is a major group of large  
85 DNA viruses that infect diverse eukaryotes in marine environments (Hingamp *et al.* 2013). A  
86 recent study revealed an association between eukaryote and *Mimiviridae* communities in a global

87 metagenomic dataset (Endo *et al.* 2020). Another study detected cooccurring pairs of eukaryotes  
88 and large DNA viruses including members of the *Mimiviridae* through time-series sampling for  
89 more than one year in Northern Skagerrak, South Norway (Gran-Stadniczeńko *et al.* 2019b).  
90 These spatial and temporal associations suggest the tight ecological interactions between diverse  
91 *Mimiviridae* and eukaryotes, that is, the obvious dependence of *Mimiviridae* replication on the  
92 activity of their hosts and the possible top-down regulatory roles of these viruses on the  
93 dynamics of the eukaryote community as a consequence of lytic infection. However, long-term  
94 studies on the associations between these viruses and eukaryotes are still limited. Thus, how their  
95 community dynamics are related or distinct is under-investigated. We recently established a  
96 highly sensitive metabarcoding method for *Mimiviridae*, which successfully detected diverse  
97 *Mimiviridae* in the Uranouchi Inlet (Prodinger *et al.* 2020). In this study, the community of  
98 *Mimiviridae* was analyzed with this method for the first time on a time-series sample set and  
99 compared with communities of microbial eukaryotes to see if they show synchronic seasonal  
100 dynamics in the study area towards better understanding their ecological interactions.

101 We also investigated the dynamics of the prokaryotic community. *Mimiviridae* and  
102 eukaryotes directly interact with each other through infection, while eukaryotes and prokaryotes  
103 interact with each other either directly by grazing and parasitism, or indirectly by metabolization  
104 of cell debris and nutrient-rich cellular exudates. An example of the indirect interaction between  
105 eukaryotes and prokaryotes can be seen during algal blooms. The decline of algal blooms is  
106 associated with the release of cellular debris and other organic substrates (Kuhlich *et al.* 2020),  
107 which become important resources for heterotrophic prokaryotes (Gómez-Pereira *et al.* 2012).  
108 Therefore, we reasoned that the prokaryotic community serves as a contrasting reference for the  
109 comparison of communities between directly interacting eukaryotes and *Mimiviridae*.

110 We performed metabarcoding of eukaryotes, prokaryotes, and *Mimiviridae* using 18S and  
111 16S rRNA genes and the *Mimiviridae polB* gene as marker genes, based on 43 seawater samples  
112 collected during 20 months from January 2017 to September 2018. Microbial communities were  
113 characterized at the amplicon sequence variant (ASV) level, which is the highest possible  
114 resolution for operational taxonomic grouping of amplicon sequences. We characterized the  
115 similarities and differences in community dynamics among eukaryotes, *Mimiviridae*, and  
116 prokaryotes.

117

## 118 **Materials and Methods**

119 **Sampling and DNA extraction.** Seawater was collected at four stations in Uranouchi  
120 Inlet, Kochi Prefecture, Japan (i.e. station “j”: 33°25'43.2"N 133°22'49.5"E, station “m”:  
121 33°25'60.0"N 133°24'38.3"E, station “f”: 33°26'33.6"N 133°24'41.8"E, station “u”:  
122 33°25'49.7"N 133°24'01.4"E). Time-series sampling was performed sporadically (average  
123 interval, 15 days) with a higher sampling frequency during summer. In total, 43 sample sets (i.e.  
124 43 seawater samples, with three size fractions each) were obtained over 20 months from 5<sup>th</sup>  
125 January 2017 (170105-j) to 25<sup>th</sup> September 2018 (180925-j). The samples were denoted with the  
126 sampling date followed by the station’s abbreviation in “yymmdd-station” format.

127 Seawater (10 L) was collected from 5-m depth, transported to the laboratory, and then  
128 filtered through 3.0- $\mu$ m (diameter 142 mm) (polycarbonate, Merck, Darmstadt, Germany) and  
129 0.8- $\mu$ m (diameter 142 mm) membranes (polycarbonate, Merck). The filtrate (1 L) was further  
130 filtered through a 0.22- $\mu$ m filtration unit (Sterivex, polycarbonate, Merck). The filters were kept  
131 at –80°C until DNA extraction with the Proteinase-K method for the 0.22- $\mu$ m filtration units

132 (Frias-Lopez *et al.* 2008) and the xanthogenate-sodium dodecyl sulfate method for larger size  
133 fractions (0.8- $\mu\text{m}$  and 3- $\mu\text{m}$  filters) (Yoshida *et al.* 2003).

134 **PCR amplification.** The 18S ribosomal RNA gene primers (forward “V8f”:  
135 ATAACAGGTCTGTGATGCCCT, reverse “1510r”: CCTTCYGCAGGTTACCTAC)  
136 (Bradley, Pinto and Guest 2016) targeting the V8/V9 region were used on both the 0.8–3  $\mu\text{m}$  and  
137 >3  $\mu\text{m}$  size fractions. Hereafter, the 0.8–3  $\mu\text{m}$  and >3  $\mu\text{m}$  fractions are referred to as the  
138 PicoNano and NanoPlus fractions, respectively. The PCR analysis was performed by mixing 5  
139  $\mu\text{L}$  of 1  $\mu\text{mol}\cdot\text{L}^{-1}$  of both primers and 2.5  $\mu\text{L}$  of 0.25  $\text{ng}\cdot\mu\text{L}^{-1}$  template DNA with 12.5  $\mu\text{L}$  2 $\times$   
140 KAPA HiFi HotStart ReadyMix (Roche, Basel, Switzerland). The thermal program was 98°C for  
141 3 min, followed by 25 cycles of 98°C for 20 s, 65°C for 15 s, 72°C for 15 s, and 72°C for 10 min.  
142 The 16S rRNA gene amplification was performed by mixing 5  $\mu\text{L}$  of 1  $\mu\text{mol}\cdot\text{L}^{-1}$  of both primers  
143 (forward “Pro-16S NGS”: CCTACGGGNBGCASCAG, reverse “Pro-16S NGS”:  
144 GACTACNVGGGTATCTAATCC) (Takahashi *et al.* 2014) with 2  $\mu\text{L}$  of 1  $\text{ng}\cdot\mu\text{L}^{-1}$  sample DNA  
145 (0.2–0.8  $\mu\text{m}$  size fraction) and 12  $\mu\text{L}$  2 $\times$  KAPA HiFi HotStart ReadyMix. The thermal program  
146 was 95°C for 3 min, then 25 cycles of 95°C for 30 s, 55°C for 30 s, 72°C for 30 s, and final  
147 extension at 72°C for 5 min. For the *Mimiviridae* DNA polymerase gene amplification, we used  
148 a recently published method that has been described in detail elsewhere (i.e. “MP10v2” in  
149 combination with “protocol 3”) (Prodinger *et al.* 2020).

150 **Clean up and sequencing.** The 18S rRNA gene and 16S rRNA gene amplicons were  
151 purified with Agencourt AMPure XP beads (Beckman Coulter, Inc., Brea, CA, USA) following  
152 Illumina’s library preparation protocol. The *Mimiviridae polB* gene amplicons were purified by  
153 gel extraction (Prodinger *et al.* 2020). After amplicon purification, dual indices were attached by  
154 PCR. The second purification was performed according to Illumina’s library preparation protocol

155 for the cellular amplicons and with gel extraction for *polB* amplicons. The final library  
156 concentration was 10 pM with a 30% PhiX spike. The sequencing data were generated with  
157 paired-end sequencing ( $2 \times 300$  nucleotides) on the MiSeq platform (Illumina, Inc., San Diego,  
158 CA, USA).

159 **Analysis of prokaryotic and eukaryotic amplicon raw reads.** The data were analyzed  
160 separately using QIIME 2 (Bolyen *et al.* 2018) with default settings unless noted otherwise. The  
161 pipelines for both prokaryotes and eukaryotes were nearly identical. The raw reads were  
162 imported to QIIME 2 (version 2020.2.0). dada2 (Callahan *et al.* 2016: 2) was used for ASV  
163 generation in QIIME 2, mostly with default settings. This included several steps. Primers were  
164 removed according to length and reads were corrected according to the dada2 algorithm. The  
165 final low quality basepairs of each read were removed (truncation at 240 bp for 18S data and at  
166 250bp for 16S data). Finally, dada2 merged forward and reverse reads and removed chimeric  
167 sequences. The ASVs were taxonomically assigned at 90% nucleotide identity using “classify-  
168 consensus-vsearch” in QIIME 2 against the SILVA 132 database (taxonomic majority, 97%) for  
169 either 16S amplicon reads or 18S amplicon reads.

170 **Analysis of *Mimiviridae polB* amplicon raw reads.** *Mimiviridae polB* ASVs were  
171 generated by a newly developed pipeline named MAPS2, which is mostly based on R (3.6.3)  
172 ([www.R-project.org](http://www.R-project.org), 17 February 2021, date last accessed) and the “dada2” package. The  
173 functions of dada2 were used with default settings unless specified otherwise. Raw reads were  
174 loaded using the “filterAndTrim” command, truncated at a length of 240 bp (both forward and  
175 reverse reads), and 2 expected read errors were accepted. Primer sequence regions were trimmed  
176 (i.e. forward reads: 40 bp and reverse reads: 38 bp). The chance of sequencing error was  
177 calculated with dada2’s “learnErrors” function and sequences were dereplicated with the



178 “derepFastq” function. The “dada” function was used on the reads, and the reads were merged  
179 with the “mergePairs” function. Chimeric sequences were removed using the  
180 “removeBimeraDenovo” function. The nucleotide sequences and the ASV table were then  
181 exported. The nucleotide sequences were searched against a database of 11,413 *polB* sequences,  
182 1,004 of which were viral *Mimiviridae* sequences, using BLASTx (2.9.0)(Altschul *et al.* 1990)  
183 (like in the original MAPS (Li *et al.* 2018)). Sequences with the best hit to viral sequences were  
184 processed further (E-value <10<sup>-5</sup>). Both the original nucleotide sequence and the amino acid  
185 sequences (translated by BLASTx) were saved. MAFFT (7.453) (Katoh and Standley 2013) was  
186 used to align the reads with those in a reference file containing 1109 PolB sequences from  
187 different organisms and viruses. The aligned PolB sequences were added to a reference tree  
188 (Endo *et al.* 2020) using pplacer (1.1.alpha19) (Matsen, Kodner and Armbrust 2010). We  
189 removed ASVs that were not within the *Mimiviridae* branch of the reference tree with R (Fig.  
190 S5). The ASVs within the *Mimiviridae* branch were split into 13 clades for community structure  
191 analysis (Fig. S5). Finally, a Python (3.7.5) ([www.python.org](http://www.python.org), 17 February 2021, date last  
192 accessed) script was used to cut the *Mimiviridae* ASV sequences in a common region. The ASVs  
193 that became identical as a result of this process were clustered using cd-hit (clustering at 100%  
194 nucleotide identity).

195 **Community composition and diversity analysis.** Communities were compared with R  
196 with the “vegan” (2.5-6) (Oksanen *et al.* 2012) and “ggplot2” (3.2.1)  
197 (<https://ggplot2.tidyverse.org>, 17 February 2021, date last accessed) packages. Singleton ASVs  
198 and ASVs that were not taxonomically assigned and datasets with fewer than 8000  
199 taxonomically assigned reads were removed before analyses of community composition (Fig. 1).  
200 Ecological analysis was performed after subsampling with “rarefy” at 8000 reads. An ASV was

201 determined to be present in the dataset if it yielded more than 0.1% of reads after subsampling.  
202 Community dissimilarity was measured using the Sørensen-Dice dissimilarity test with vegan's  
203 “vegdist” function (method = “bray”, binary = T), as follows:

$$dissimilarity_{SD} = \frac{2|community_A \cap community_B|}{|community_A| + |community_B|}$$

204 Mantel test was performed using R's “mantel” command (5 million permutations). The  
205 NMDS analysis was conducted with R's “cmdscale” command, and stress was calculated using  
206 the “sammon” command (MASS package). The similarity of communities among seasons was  
207 calculated by binning datasets of several months: winter (December to February), spring (March  
208 to May), summer (June to August), and fall (September to November). The  $p$  values for seasonal  
209 differences were calculated with R's “t.test” command, if more than 100 values were compared  
210 we used the “pairwise.t.test” command with Benjamini–Hochberg correction.

211 **Cell counts, biotic, and abiotic data.** Environmental metadata (temperature, salinity,  
212 phytoplankton cell counts, and concentrations of nutrients, organic and inorganic forms of  
213 nitrogen and phosphorus, dissolved oxygen, and chlorophyll  $a$ ) for the Uranouchi Inlet from  
214 2013 to 2019 were obtained from the observation records of the Kochi Prefectural Fisheries  
215 Research Institute with appropriate ethics approval. Since these records aim to monitor and  
216 forecast HABs in the sampling area, cell count data were only collected for HAB species. We  
217 used the daily maximum cell count data in this study. Different species are considered to be  
218 blooming at different cellular concentrations, because bloom identification is linked to  
219 heightened fish mortality according to the Prefectural Fisheries Research Institute  
220 (<https://www.pref.kochi.lg.jp/soshiki/040409>, 17 February 2021, date last accessed). Fish  
221 mortality rates increase when *Chattonella* spp. reaches cellular concentrations as low as 10 to  
222 100 cells mL<sup>-1</sup>; when *K. mikimotoi* (an unarmored, solitary dinoflagellate, 24–40 μm long, 20–32

223  $\mu\text{m}$  wide (Omura *et al.*) reaches concentrations ranging from several 100 to 1000 cells·mL<sup>-1</sup>;  
224 and when *H. akashiwo* (kidney shaped, motile dinoflagellate, 8–25  $\mu\text{m}$  long (Omura *et al.*)  
225 reaches concentrations starting from 10.000 cells·mL<sup>-1</sup>.

226

## 227 **Results**

228 **Seasonal variations in abiotic and biotic environmental factors.** Abiotic factors (i.e.  
229 temperature and salinity) and the concentrations of nutrients (i.e. nitrogen species and phosphate),  
230 dissolved oxygen, and chlorophyll *a* were recorded over 6 years (Fig. S1). Temperature and  
231 salinity showed the most pronounced seasonality among all recorded biotic and abiotic factors.  
232 The differences in seasonality were less pronounced for other factors, although the  
233 concentrations of nutrients and chlorophyll *a* were higher in summer and autumn than in winter  
234 and spring (Fig. S2).

235 **Seasonal variation of bloom-forming phytoplankton.** The abundance of six harmful algal  
236 bloom (HAB) -forming phytoplankton (i.e. *Heterocapsa circularisquama* (Dinophyceae), *K.*  
237 *mikimotoi* (Dinophyceae), *Cochlodinium polykryoides* (Dinophyceae), *Chattonella* spp.  
238 (Raphidophyceae), *H. akashiwo* (Raphidophyceae), and *Pseudochattonella verruculosa*  
239 (Ochrophyta, Dictyochophyceae)) were recorded by microscopic cell counting from 2013 to  
240 2019. Blooms of three species (i.e. *H. akashiwo*, *K. mikimotoi*, *Chattonella* spp.) occurred in the  
241 inlet and showed an approximately seasonal pattern: *H. akashiwo* bloomed in late spring (April  
242 or May), *K. mikimotoi* bloomed in early summer (~June), and *Chattonella* spp. bloomed in the  
243 middle of summer (~July). This pattern was observed in 5 of the 6 years we monitored (Fig.  
244 S2M). In 2014, 2015, and 2018, a second *H. akashiwo* bloom occurred (Fig. S1G). The highest  
245 daily cell counts of these species were in 2018 or 2019 (Fig. S1G). Blooms of *H.*

246 *circularisquama*, *C. polykrycoides*, and *P. verruculosa* did not occur every year and their  
247 maximum abundances were relatively low (29–4900 cells·mL<sup>-1</sup>) (Fig. S1G, and Fig. S2M).

248 **Overview of sequence data.** We generated from 36 to 43 metabarcoding datasets for four  
249 different communities (i.e. eukaryotic NanoPlus (>3 μm) and PicoNano (0.8–3 μm), prokaryotes  
250 (0.2–0.8 μm), and *Mimiviridae* (0.2–0.8 μm)) from a total of 43 sample sets. After discarding  
251 datasets with <8000 reads, 36 to 41 datasets were retained for each community (i.e. eukaryotic  
252 NanoPlus community: 41; eukaryotic PicoNano community: 36; prokaryotes: 38; *Mimiviridae*:  
253 41). These metabarcoding datasets were composed of 5.2 million eukaryotic reads, 3.4 million  
254 prokaryotic reads, and 5.7 million *Mimiviridae* reads (Table 1). The subsampled datasets showed  
255 similar curve shapes and slopes at 8,000 reads, indicating sufficient sequencing depth for all four  
256 communities (Fig. S3).

257 The eukaryotic reads were grouped into 6413 ASVs. Only 1501 ASVs (23.4%) were  
258 represented in both NanoPlus (3356 ASVs) and PicoNano (4559 ASVs) datasets, but those ASVs  
259 accounted for 97.3% and 90.1% of total reads in the NanoPlus and PicoNano datasets,  
260 respectively. The *Mimiviridae* reads were grouped into 6261 ASVs, whilst the prokaryotic reads  
261 were grouped into 4478 ASVs. The subsampled datasets also showed relatively low richness for  
262 eukaryotes in the NanoPlus size fraction (1486 ASVs) compared with eukaryotes in the  
263 PicoNano size fraction (2184 ASVs), prokaryotes (2383 ASVs) and *Mimiviridae* (3693 ASVs).  
264 Shannon's diversity fluctuated throughout the sampling period (Fig. S4). The eukaryotic  
265 community in the NanoPlus size fraction was less diverse than other communities during most of  
266 the sampling period (Table 1, Fig. S4).

267 **Composition of eukaryote, prokaryote, and *Mimiviridae* communities.** Eukaryotic ASVs  
268 were classified into 16 groups (from phylum to genus levels) as shown in Figure 1. These 16

269 groups accounted for 98.7% of the eukaryotic reads from the NanoPlus dataset (Fig. 1A). The  
270 group with the highest relative read abundance was Metazoa (28.6%, 625 ASVs), followed by  
271 Diatomea (25.1%, 234 ASVs) and Dinoflagellata (22.5% including Dinophyceae, 469 ASVs).  
272 These three groups accounted for 77.0% of total reads. Each of the other 13 groups accounted for  
273 0.06% to 6.6% of total reads. The relative abundance of ASVs of HAB-forming genera and  
274 families, namely *Heterosigma*, *Chattonella*, and Kareniaceae, was 0.26%, 2.1%, and 5.8%,  
275 respectively (Fig. 1A and Fig. 1B). Each of these groups was dominated by a single ASV; the  
276 most abundant ASV in each group accounted for more than 96.1% of the total reads in that group.

277 The 16 selected eukaryotic groups accounted for 88.8% of the eukaryotic reads in the  
278 PicoNano dataset. The most abundant groups were “other Alveolata” (Alveolata that were not  
279 classified as Dinoflagellata; 17.5%, 1201 ASVs), Metazoa (17.2%, 376 ASVs), and “other  
280 Stramenopiles” (Stramenopiles that were not classified as Diatomea or Raphidophyceae, 12.4%,  
281 716 ASVs); these three groups accounted for 47.1% of all reads (Fig. 1B). Each of the remaining  
282 13 groups contributed from 0.14% to 7.7% of total reads. The HAB-forming groups Kareniaceae,  
283 *Chattonella*, and *Heterosigma* accounted for 7.7%, 1.5%, and 0.75% of total reads, respectively.  
284 The most abundant ASVs in these three groups contributed more than 88% of their respective  
285 groups. Diatomea, Dinophyceae, and Haptophyta contributed 7.3%, 6.4%, and 5.9% of total  
286 reads, respectively. All other groups contributed less than 5%. Chlorophytes (including  
287 Trebouxiophyceae, Prasinophytiae, Mamiellophyceae, and Tetraselmis) accounted for 7.2% of all  
288 reads.

289 Prokaryotic reads were dominated by three phyla (i.e. Proteobacteria, Bacteroidetes, and  
290 Cyanobacteria), which represented 89.3% of all prokaryotic reads (Fig. 1D). The most abundant  
291 phylum was Proteobacteria (2164 ASVs and 53.6% of total reads), 72.1% of which belonged to

292 Alphaproteobacteria. Bacteroidetes (992 ASVs and 20.4% of total reads) was dominated by  
293 Bacteroidia (967 ASVs, 91.4% of Bacteroidetes reads). Cyanobacteria was dominated by  
294 Oxyphotobacteria (99.9% of Cyanobacteria reads). Three other phyla (Verrucomicrobiae,  
295 Actinobacteria, and Planctomycetes) contributed 4.8%, 3.8%, and 0.5% of total prokaryotic  
296 reads, respectively. Overall, these six phyla contributed 98.4% of prokaryotic reads.

297 We classified the 5701 *Mimiviridae* ASVs (of the 6261 total *Mimiviridae* ASVs) into 13  
298 clades based on their phylogeny (Fig. S5). The majority of amplicon reads (61.9%) were  
299 assigned to clades 6 (518 ASVs, 24.0%), 3 (665 ASVs, 20.7%), and 5 (535 ASVs, 17.2%). The  
300 other ten clades contributed from 0.3% to 8.4% of total *Mimiviridae* reads. Six out of the 13  
301 *Mimiviridae* clades included previously studied *Mimiviridae* (clades 1, 3, 8, 9, 10, 13) (Fig. S5).  
302 Of these six clades, clade 3, which includes Organic lake phycodnavirus 1 and 2 (Zhang *et al.*  
303 2015), had the largest number of reads (20.7%). Clade 1 (7.8% of *Mimiviridae* reads) included  
304 haptophytes (Prymnesiophyceae) infecting *Mimiviridae* (Santini *et al.* 2013; Gallot-Lavallée *et*  
305 *al.* 2015; Johannessen *et al.* 2015). Clade 10 (2.4% of *Mimiviridae* reads) contained the  
306 predatory Choanoflagellate infecting virus ChoanoV1 (Needham *et al.* 2019). Each of the other  
307 clades (clades 8, 9, 13) with known *Mimiviridae* contributed less than 2% of *Mimiviridae* reads.

308 **Synchronic seasonal changes in microbial communities.** The non-metric  
309 multidimensional scaling (NMDS) ordination of the datasets revealed similar seasonal patterns  
310 for the four communities (Fig. 2). Datasets from the same month clustered together in the plot,  
311 except for June datasets, thereby forming a yearly cycling of community succession. Consistent  
312 with this observation, the community dynamics were significantly correlated among the four  
313 microbial communities (Mantel test, correlation coefficients  $>0.75$ ,  $p < 10^{-4}$ ; Fig. S6). The  
314 average Sørensen-Dice dissimilarity between datasets from the same season ranged from 0.58 to

315 0.78 (Fig. 3), while that between datasets from opposite seasons (i.e. winter vs. summer or spring  
316 vs. fall) ranged from 0.77 to 0.94), indicative of greater dissimilarity of communities between  
317 opposite seasons (Fig. 3). The spring and fall communities differed from each other as much as  
318 the summer and winter communities (Fig. 3). The dissimilarities within the same season were  
319 significantly lower than those between spring and fall ( $p < 10^{-16}$ ) and between summer and winter  
320 ( $p < 10^{-16}$ ). However, dissimilarities between summer and winter communities did not  
321 significantly differ from those between spring and fall communities ( $p > 0.1$ ), except that spring  
322 vs. fall dissimilarities were higher than summer vs. winter dissimilarities for the prokaryotic  
323 community ( $p < 10^{-6}$ ).

324 **Distinct patterns in seasonal dynamics among eukaryote, prokaryote, and**  
325 ***Mimiviridae* communities.** The annual cycles of the communities were characterized by plotting  
326 the community dissimilarity between samples against the length of time separating the sampling  
327 events (Fig. 4A–D). In addition, we calculated the dissimilarities between communities sampled  
328 at intervals of approximately 1-month (i.e.  $30 \pm 10$  days; hereafter D30), approximately 6 months  
329 (i.e.  $182 \pm 30$  days; D182), and approximately one year (i.e.  $365 \pm 30$  days; D365).

330 The level of these dissimilarity measures (i.e. D30, D182, and D365) was consistent with  
331 the yearly cycle pattern observed for the four communities (Fig. 4E–G). D182 was the largest  
332 among these measures for all communities (NanoPlus, PicoNano, prokaryotes, *Mimiviridae*), and  
333 the levels of D30 and D365 were comparable. However, these measures substantially differed  
334 when compared between communities ( $p < 10^{-6}$ ), except for the comparisons between  
335 *Mimiviridae* and PicoNano communities for D30 and D365. These measures were the highest for  
336 *Mimiviridae* and PicoNano communities, followed by the NanoPlus community. The prokaryotic  
337 community showed the lowest dissimilarity values for all measures (i.e. D30, D182, and D365).

338           **Recurrence and persistence of ASVs.** To dissect the dynamics of the eukaryote,  
339 prokaryote, and *Mimiviridae* communities, we investigated temporal patterns in the occurrence  
340 of individual ASVs. First, we analyzed the temporal pattern of the four most abundant ASVs in  
341 each community (Fig. 5). This analysis revealed that the dynamics of the selected prokaryotic  
342 ASVs clearly differed from those of other ASVs. The prokaryotic ASVs were characterized by a  
343 relatively low maximum relative abundance (<31%), whilst the dynamics of the most abundant  
344 ASVs from other communities (i.e. NanoPlus, PicoNano, and *Mimiviridae*) were characterized  
345 by sharp peaks in relative abundance (up to 70%) (Fig. 5). The most abundant prokaryotic ASV  
346 was assigned to SAR11 (Clade 1a) and showed 10%–30% relative abundance more than 7  
347 months from late autumn to early spring (present in 32 samples in total).

348           This result prompted us to further examine recurrence (i.e. number of samples in which  
349 an ASV was detected) and persistence (i.e. maximum number of successive samples in which an  
350 ASV was detected) of ASVs. In this analysis, we considered all the ASVs with >1% relative  
351 abundance in at least one sample. Among the four microbial groups, prokaryotes showed the  
352 highest level of ASV recurrence, and *Mimiviridae* showed the lowest (Fig. 6). Similarly,  
353 prokaryotes showed longer ASV persistence compared with the other microbe groups (Fig. S7).  
354 For instance, three prokaryotic ASVs (of 73 prokaryotic ASVs) were continuously present in  
355 more than 19 datasets, while there were no such long-lasting ASVs in the *Mimiviridae* or  
356 eukaryote groups.

## 357 **Discussion**

358           Eukaryotic communities in the study area were dominated by Metazoa, Alveolata, and  
359 Stramenopiles. These lineages are commonly found in coastal eukaryotic communities (Chen *et*  
360 *al.* 2017; Martin-Platero *et al.* 2018; Gran-Stadniczeňko *et al.* 2019a), although detailed



361 compositions of microbial eukaryote communities in coastal areas vary among different  
362 locations (Chen *et al.* 2017; Martin-Platero *et al.* 2018; Gran-Stadniczeňko *et al.* 2019a). A  
363 notable feature of the study area is the occurrence of HABs (Fig. 1C), which were detected in our  
364 sequence data (Fig. 1A, B). The prokaryotic communities in the Uranouchi Inlet (Fig. 1D) were  
365 similar to those reported for other coastal areas, where the communities are mainly composed of  
366 Proteobacteria, Bacteroidetes, and Cyanobacteria (Sakami *et al.* 2016; Martin-Platero *et al.* 2018;  
367 Santi *et al.* 2019), but different from those in brackish water (Fazi *et al.* 2020) or freshwater  
368 (Bock *et al.* 2018), which are dominated by the same phyla, but different classes. Finally, the  
369 previously developed metabarcoding method (Prodinger *et al.* 2020) revealed diverse  
370 *Mimiviridae* (6261 ASVs, 464.6 ASVs per sample on average) that were grouped into 13 clades  
371 (Fig. 1E).

372 All four studied microbial communities, including the community of *Mimiviridae*,  
373 showed clear seasonal cycles (Fig. 2). Such seasonal changes in microbial communities have  
374 been reported previously for eukaryotes (Giner *et al.* 2019; Gran-Stadniczeňko *et al.* 2019a),  
375 bacteria (Ward *et al.* 2017; Chafee *et al.* 2018), large DNA viruses (Sandaa *et al.* 2018; Gran-  
376 Stadniczeňko *et al.* 2019b), and smaller viruses (Chow and Fuhrman 2012; Pagarete *et al.* 2013;  
377 Ignacio-Espinoza, Ahlgren and Fuhrman 2020). The greatest dissimilarity in communities in our  
378 datasets was between communities sampled at 6-month intervals (Fig. 4F), while communities  
379 were more similar when compared at approximately 12-month intervals (Fig. 4G), indicating a  
380 recovery of community structure after one year. The high dissimilarity between summer and  
381 winter datasets was expected, since physicochemical parameters such as temperature are very  
382 different between these two seasons. However, for all microbe groups, the microbial  
383 communities in spring vs. fall were as dissimilar as the communities in summer vs. winter (Fig.

384 3), even though the differences in water conditions (e.g. temperature, salinity, and nutrient  
385 concentrations) were less pronounced between fall and spring than between summer and winter  
386 (Fig. S1, S2). We also observed that the community compositions were relatively similar  
387 between samples collected in successive months (Fig. 2 and Fig. 4E). These observations suggest  
388 that the dynamics of microbial communities cannot be explained solely by changes in abiotic  
389 factors, but are governed by a Markovian process in which the current biotic state substantially  
390 influences the next biotic state. This pattern is obvious in macro-ecosystems; for example, a  
391 forest looks different in spring and autumn even on days with similar weather. Microbial  
392 communities with a much higher turnover rate (one to several days) appear to be no exception to  
393 this rule. A previous study on oceanic microbial communities suggested that biotic factors (such  
394 as the subset of communities) are better predictors of microbial community composition than are  
395 abiotic factors (such as geography, nutrient concentration, and temperature) (Lima-Mendez *et al.*  
396 2015). This reinforces the classical notion that the sum of biotic and abiotic factors forms the  
397 environment that affects individual microorganisms. We suggest that the microbial communities  
398 in the Uranouchi Inlet at a given time strongly influence the formation of the next generation of  
399 communities. A similar observation and idea has been proposed for post-bloom communities  
400 (Needham and Fuhrman 2016).

401 All the studied microbial communities became similar to the original communities after a  
402 year, but the recovery level of community structure was far below 100% (i.e. 19% to 44%  
403 recovery, Fig. 4). In other words, more than half of the ASVs in the original communities were  
404 undetected by deep sequencing one year later. Previous long-term studies on prokaryotic  
405 (Fuhrman, Cram and Needham 2015) and viral communities (Chow and Fuhrman 2012; Ignacio-  
406 Espinoza, Ahlgren and Fuhrman 2020) detected a similar trend that continued for several years.

407 Therefore, it seems legitimate to postulate that the marine microbial community structure at the  
408 ASV level never perfectly recovers over time (Fig. 7A). This implies a significant role of the  
409 “invisible” rare biosphere in the formation of a new community structure through their capacity  
410 to bring forth new abundant microbes over time (Giner *et al.* 2019; Ignacio-Espinoza, Ahlgren  
411 and Fuhrman 2020). The rare biosphere may be undetectable, even with state-of-the-art  
412 metabarcoding approaches as used in this study. The technical limitations in uncovering the rare  
413 biosphere combined with its capacity to substantially replace abundant populations may explain  
414 why microbes cannot completely recover their community structure, although migration and  
415 evolution could also have effects. Interestingly, Furman et al. found that the dissimilarity of  
416 bacterial community structure increased during the first four years of analysis (Fuhrman, Cram  
417 and Needham 2015). After this period, the dissimilarity level still fluctuated (according to  
418 seasonal dynamics) but its basal level remained constant (Fuhrman, Cram and Needham 2015).  
419 This and our observations suggest the existence of a “memory” (or a historical trace) of the  
420 original community structure that influences the structures of successive communities only for a  
421 short time period (one to a few years) (Fig. 7A).

422         Although a pattern of annual cycling and partial recovery after a year was commonly  
423 observed for the four microbial communities in this study, the degree and speed of changes in the  
424 community structure showed intriguing differences among the communities (Fig. 4). A  
425 schematic diagram in Fig. 7B illustrates the conceptual and qualitative differences in the  
426 observed community dynamics among eukaryotes, prokaryotes, and *Mimiviridae* (Fig. 7B). The  
427 D182 and D365 values were highest for *Mimiviridae* and lowest for prokaryotes. Thus, in terms  
428 of “memory” of community structure, *Mimiviridae* have the shortest memory, eukaryotes have  
429 medium memory, and prokaryotes have the longest memory. The rapid change and a low level of

430 recovery after one year for the *Mimiviridae* community contrasts with the result from a previous  
431 study on the seasonal changes of small viruses (i.e. mostly bacterial viruses), which detected  
432 strong stability of the small virus community, with 95% of viral contigs present in all samples  
433 (Ignacio-Espinoza, Ahlgren and Fuhrman 2020). In the Uranouchi Inlet, the prokaryotic  
434 community changed slowly and showed the highest level of recovery after a year. The distinct  
435 community dynamics between prokaryotes and eukaryotes in the Uranouchi Inlet is consistent  
436 with a previous study conducted on a shorter time scale (Martin-Platero *et al.* 2018); they found  
437 prokaryotic communities to be more stable and to change more slowly than eukaryotic  
438 communities.

439       To dissect the differences in the community dynamics, we analyzed the recurrence and  
440 persistence of ASVs among eukaryote, *Mimiviridae*, and prokaryote communities. The  
441 recurrence and persistence levels of ASVs (Fig. 6, Fig. S7) and the relative abundance of  
442 abundant ASVs (Fig. 5) differed among the microbial groups. Overall, *Mimiviridae* ASVs  
443 showed lower recurrence and persistence levels than eukaryotic ASVs. In contrast, prokaryotic  
444 ASVs showed higher recurrence and persistence levels than eukaryotic ASVs. The abundant  
445 *Mimiviridae* ASVs were found only in a few samples but they had high relative abundance  
446 (21.1%–71.3%). In contrast, the abundant prokaryotic ASVs were dominant throughout much of  
447 the year, whilst their maximum relative abundance was lower (<30%) than that of dominant  
448 ASVs in other microbial groups (Fig. 5). The pattern of eukaryotic ASVs occurrence was  
449 between these extremes. The four most abundant ASVs in the PicoNano and the NanoPlus  
450 groups had high relative abundance (23.5%–90.3%) but were present in more samples than were  
451 the most abundant *Mimiviridae* ASVs (Fig. 5). Therefore, the systematic differences in the

452 recurrence/persistence levels of individual ASVs are consistent with the differences in the  
453 dynamics at the community level.

454         The differences in the community and ASV dynamics among eukaryotes, *Mimiviridae*,  
455 and prokaryotes may result from the limitations of metabarcoding. It is worth noting that ASVs  
456 may have different resolutions across microbial groups. For instance, the result that bacterial  
457 ASVs showed longer persistence than eukaryote and *Mimiviridae* ASVs may be because their  
458 resolution was lower. However, if we assume that this is the case, the comparatively high  
459 abundance peaks for the major eukaryotic and *Mimiviridae* ASVs become difficult to  
460 compromise, because their resolution was assumed to be higher than that of bacterial ASVs.  
461 Thus, the differences in the ASV community dynamics likely reflect some essential features of  
462 the dynamics of the populations belonging to the respective microbial communities. In the  
463 following paragraph, we attempt to explain these differences in light of the possible ecological  
464 strategies of individual populations within those communities.

465         The population dynamics of microbes largely depend on resource availability and their  
466 survival strategies, which have historically been classified into “*r*” and “*K*” strategies. The  
467 original interpretation of *r/K* selection theory states that organisms maximize their fitness  
468 through either high reproduction rates (high *r*), or the ability to constantly exist in relatively high  
469 numbers (high carrying capacity, *K*) (Andrews and Harris 1986). In microbial ecology, the *r/K*  
470 nomenclature has often been used more qualitatively (Andrews and Harris 1986). That is, “*r*-  
471 strategists” are specialized to rapidly consume resources and reproduce quickly (Andrews and  
472 Harris 1986) so that they thrive through an influx of nutrients (Santi *et al.* 2019). In contrast, *K*-  
473 strategists adapt to a stable environment with limited resources (Andrews and Harris 1986). They

474 tend to show slow growth rates and their population dynamics are more stable than those of *r*-  
475 strategists (Endo, Ogata and Suzuki 2018).

476 In our study, several of the major eukaryotic ASVs were present over a long period of  
477 time (i.e. the *Skeletonema* sp. ASV, the *Oithona davisae* ASV and the Dinoflagellata ASV; Fig.  
478 5), reminiscent of *K*-strategists. The Dinoflagellata ASV in the NanoPlus fraction was abundant  
479 throughout several months in spring during oligotrophic conditions. The *Oithona davisae* ASV  
480 (a copepod preying on plankton) was present throughout the year with no pronounced peak in its  
481 relative abundance. In contrast, other abundant ASVs (e.g. the Symbiodinium ASV) and those  
482 assigned to HAB species (e.g. the *Chattonella* spp. ASVs, the *K. mikimotoi* ASVs, and the *H.*  
483 *akashii* ASVs; Fig. 1A and B) emerged only occasionally but with a high relative abundance  
484 (>20%). The dynamics of the HAB ASVs were consistent with their cell counts (Fig. 1C). They  
485 formed blooms only during the months with high nutrient availability (Fig. S1, Fig. S2). This  
486 ecological characteristic is typical of *r*-strategists (Andrews and Harris 1986; Endo, Ogata and  
487 Suzuki 2018).

488 The majority of *Mimiviridae* ASVs showed low persistence and occasional high peaks in  
489 relative abundance. The most abundant *Mimiviridae* ASVs occurred only in a few samples but  
490 had high relative abundance of over 70% (Fig. 5). These dynamics are reminiscent of *r*-  
491 strategists that show a rapid boom and bust appearance. The lower recurrence and persistence of  
492 *Mimiviridae* ASVs than eukaryote ASVs likely originate in the fact that the presence of viruses  
493 depends on the presence of their hosts, not vice versa. Furthermore, the possible existence of  
494 multiple *Mimiviridae* that compete for the same eukaryotic host species (Baudoux and Brussaard  
495 2005) may lead to the *r*-strategist like feature in the dynamics of *Mimiviridae* ASVs.

496           A recent study suggested that *Mimiviridae* that infect *K*-strategist eukaryotes have long  
497 infection and latent periods to maximize the chance of vertical transmission, since the chances of  
498 horizontal transmissions are low due to the low host density (Blanc-Mathieu *et al.* 2020). Viruses  
499 of *K*-strategist eukaryotes are more likely to exist inside the host cell (i.e. a long latent period),  
500 while viruses of *r*-strategist eukaryotes are more likely to be found outside their host (i.e. they  
501 show higher virulence and tend to produce virions more quickly) (Blanc-Mathieu *et al.* 2020).  
502 The size fraction we used for the detection of viral sequences (0.2–0.8  $\mu\text{m}$ ) may be enriched in  
503 free virions, which might have led to the preferential detection of *r*-strategist *Mimiviridae*. A few  
504 *Mimiviridae* ASVs showed a relatively long persistence (occurrence in more than ten continuous  
505 samples) (Fig. S6) or a high recurrence level (Fig. 6). Investigation of active *Mimiviridae* (e.g. by  
506 RNA-Seq from the PicoNano and NanoPlus fractions) may reveal *Mimiviridae* ASVs showing  
507 *K*-strategist dynamics.

508           The most abundant prokaryotic ASVs had comparatively low relative abundances (Fig. 5),  
509 but were found in many samples (Fig. 6). The most abundant prokaryotic ASV belonged to  
510 SAR11, which is a *K*-strategist characterized by its ubiquitous presence in the ocean and low  
511 maximum growth rate (Suttle 2007; Giovannoni 2017). As expected, this ASV was abundant  
512 during months with low nutrient availability with no pronounced sharp peaks in abundance.  
513 Several bacterial genera are known to be *r*-strategists (e.g. *Ulvibacter*, *Formosa*, and  
514 *Polaribacter*) (Teeling *et al.* 2012, 2016; Needham and Fuhrman 2016), but they were not highly  
515 represented in our dataset. In this study, prokaryotic communities were more stable than were  
516 eukaryotic and *Mimiviridae* communities. Heterotrophic prokaryotes depend on organic  
517 substrates especially from eukaryotes, but their interactions are mostly indirect and less specific  
518 compared with the specificity of *Mimiviridae*-eukaryote interactions. Overall, the distinct

519 community dynamics among eukaryotes, *Mimiviridae*, and prokaryotes revealed in our study  
520 may be due to the differences in specificity of interactions as well as the prevalence of *r* vs. *K*  
521 strategies among these microbial groups.

522 In summary, our study revealed synchronic seasonal cycles for eukaryote, *Mimiviridae*,  
523 and prokaryote communities in the Uranouchi Inlet. The seasonality could not be explained  
524 solely by abiotic factors and is suggested to be shaped through a Markovian process of  
525 successive communities under the influence of abiotic factors. Despite their synchronized  
526 community dynamics, we discovered intriguing differences in the dynamics in several aspects,  
527 including the length of “community memory” among eukaryotes, *Mimiviridae*, and prokaryotes.  
528 These differences at the community level were consistent with the recurrence and persistence of  
529 individual ASVs in the respective communities. Therefore, the distinct community dynamics  
530 among eukaryotes, *Mimiviridae*, and prokaryotes likely originate in systematic differences in the  
531 specificity of interactions (i.e. virus-eukaryote vs prokaryote-eukaryote) as well as the dominant  
532 survival strategies across the studied microbial groups. Overall, our results provide an important  
533 step towards mechanistically understanding the community dynamics of microorganisms in light  
534 of ecological strategies of individual microorganisms.  
535



## 536 **Acknowledgments**

537 F.P. performed experiments, bioinformatics analyses, and wrote the initial manuscript.  
538 H.E., K.N., T.Y. and H.O. designed the work, helped to interpret the results, and improved the  
539 manuscript. Y.G. and H.T. contributed to sequencing. R.B.M and Y.L. contributed to  
540 bioinformatics analysis. K.T. and I.T. contributed to experimental analyses. Y.T., K.N., and E.T.  
541 contributed to sampling. All authors contributed to writing and agreed to the final manuscript.

## 542 **Funding**

543 This work was supported by The Canon Foundation [No. 203143100025];  
544 JSPS/KAKENHI [Nos. 26430184, 17H03850, 18H02279, and 16H06279 (PAGS)]; Scientific  
545 Research on Innovative Areas from the Ministry of Education, Culture, Science, Sports and  
546 Technology (MEXT) of Japan [Nos. 16H06429, 16K21723, and 16H06437]; The Kyoto  
547 University Foundation, and the Collaborative Research Program of the Institute for Chemical  
548 Research, Kyoto University [Nos. 2019-33, 2018-31, 2017-25, and 2016-28]. Computational  
549 work was completed at the SuperComputer System, Institute for Chemical Research, Kyoto  
550 University. We thank the Kochi Prefectural Fisheries Research Institute for providing  
551 environmental metadata. We thank Jennifer Smith, PhD, from Edanz Group ([https://en-author-](https://en-author-services.edanz.com/)  
552 [services.edanz.com/](https://en-author-services.edanz.com/)), for editing a draft of this manuscript.

553 The authors declare no conflict of interest.

554

## 555 **Data availability**

556 The raw sequencing data of this study have been deposited in the DNA database of Japan  
557 (accession number DRA010976). The environmental data and cell count data are available in the

558 Microsoft Excel file (dataset S1). The amplicon data analysis pipelines for eukaryotes,  
559 prokaryotes, and *Mimiviridae* have been deposited online and are available for download  
560 ([www.github.com/FlorianProdinge/pipeline\\_18S](http://www.github.com/FlorianProdinge/pipeline_18S),  
561 [www.github.com/FlorianProdinge/pipeline\\_16S](http://www.github.com/FlorianProdinge/pipeline_16S), [www.github.com/FlorianProdinge/MAPS2](http://www.github.com/FlorianProdinge/MAPS2),  
562 17 February 2021, date last accessed).

## 563 **References**

- 564 Altschul SF, Gish W, Miller W *et al.* Basic local alignment search tool. *J Mol Biol*  
565 1990;**215**:403–10.
- 566 Andrews JH, Harris RF. r- and K-Selection and Microbial Ecology. In: Marshall KC (ed.).  
567 *Advances in Microbial Ecology*. Vol 9. Boston, MA: Springer US, 1986, 99–147.
- 568 Arkhipova K, Skvortsov T, Quinn JP *et al.* Temporal dynamics of uncultured viruses: a new  
569 dimension in viral diversity. *ISME J* 2018;**12**:199.
- 570 Baudoux A-C, Brussaard CPD. Characterization of different viruses infecting the marine harmful  
571 algal bloom species *Phaeocystis globosa*. *Virology* 2005;**341**:80–90.
- 572 Blanc-Mathieu R, Dahle H, Hofgaard A *et al.* The genome of a persistent giant algal virus  
573 encodes an unprecedented number of genes involved in energy metabolism. *bioRxiv*  
574 2020:2020.07.30.228163.
- 575 Bock C, Salcher M, Jensen M *et al.* Synchrony of Eukaryotic and Prokaryotic Planktonic  
576 Communities in Three Seasonally Sampled Austrian Lakes. *Front Microbiol* 2018;**9**,  
577 DOI: 10.3389/fmicb.2018.01290.
- 578 Bolyen E, Rideout JR, Dillon MR *et al.* *QIIME 2: Reproducible, Interactive, Scalable, and*  
579 *Extensible Microbiome Data Science*. PeerJ Inc., 2018.
- 580 Bradley IM, Pinto AJ, Guest JS. Design and Evaluation of Illumina MiSeq-Compatible, 18S  
581 rRNA Gene-Specific Primers for Improved Characterization of Mixed Phototrophic  
582 Communities. Voordouw G (ed.). *Appl Environ Microbiol* 2016;**82**:5878–91.
- 583 Brum JR, Sullivan MB. Rising to the challenge: accelerated pace of discovery transforms marine  
584 virology. *Nat Rev Microbiol* 2015;**13**:147–59.
- 585 Callahan BJ, McMurdie PJ, Rosen MJ *et al.* DADA2: High-resolution sample inference from  
586 Illumina amplicon data. *Nat Methods* 2016;**13**:581–3.
- 587 Chafee M, Fernández-Guerra A, Buttigieg PL *et al.* Recurrent patterns of microdiversity in a  
588 temperate coastal marine environment. *ISME J* 2018;**12**:237–52.
- 589 Chen W, Pan Y, Yu L *et al.* Patterns and Processes in Marine Microeukaryotic Community  
590 Biogeography from Xiamen Coastal Waters and Intertidal Sediments, Southeast China.  
591 *Front Microbiol* 2017;**8**, DOI: 10.3389/fmicb.2017.01912.
- 592 Chow C-ET, Fuhrman JA. Seasonality and monthly dynamics of marine myovirus communities.  
593 *Environ Microbiol* 2012;**14**:2171–83.
- 594 Endo H, Blanc-Mathieu R, Li Y *et al.* Biogeography of marine giant viruses reveals their  
595 interplay with eukaryotes and ecological functions. *Nat Ecol Evol* 2020:1–11.

- 596 Endo H, Ogata H, Suzuki K. Contrasting biogeography and diversity patterns between diatoms  
597 and haptophytes in the central Pacific Ocean. *Sci Rep* 2018;**8**:1–13.
- 598 Fazi S, Baldassarre L, Cassin D *et al.* Prokaryotic community composition and distribution in  
599 coastal sediments following a Po river flood event (northern Adriatic Sea, Italy). *Estuar*  
600 *Coast Shelf Sci* 2020;**233**:106547.
- 601 Frias-Lopez J, Shi Y, Tyson GW *et al.* Microbial community gene expression in ocean surface  
602 waters. *Proc Natl Acad Sci U S A* 2008;**105**:3805–10.
- 603 Fuhrman JA, Cram JA, Needham DM. Marine microbial community dynamics and their  
604 ecological interpretation. *Nat Rev Microbiol* 2015;**13**:133–46.
- 605 Gallot-Lavallée L, Pagarete A, Legendre M *et al.* The 474-Kilobase-Pair Complete Genome  
606 Sequence of CeV-01B, a Virus Infecting Haptolina (*Chrysochromulina*) *ericina*  
607 (*Prymnesiophyceae*). *Genome Announc* 2015;**3**, DOI: 10.1128/genomeA.01413-15.
- 608 Gilbert JA, Steele JA, Caporaso JG *et al.* Defining seasonal marine microbial community  
609 dynamics. *ISME J* 2012;**6**:298–308.
- 610 Giner CR, Balagué V, Krabberød AK *et al.* Quantifying long-term recurrence in planktonic  
611 microbial eukaryotes. *Mol Ecol* 2019;**28**:923–35.
- 612 Giovannoni SJ. SAR11 Bacteria: The Most Abundant Plankton in the Oceans. *Annu Rev Mar Sci*  
613 2017;**9**:231–55.
- 614 Gómez-Pereira PR, Schüler M, Fuchs BM *et al.* Genomic content of uncultured Bacteroidetes  
615 from contrasting oceanic provinces in the North Atlantic Ocean. *Environ Microbiol*  
616 2012;**14**:52–66.
- 617 Gran-Stadniczeňko S, Egge E, Hostyeva V *et al.* Protist Diversity and Seasonal Dynamics in  
618 Skagerrak Plankton Communities as Revealed by Metabarcoding and Microscopy. *J*  
619 *Eukaryot Microbiol* 2019a;**66**:494–513.
- 620 Gran-Stadniczeňko S, Krabberød AK, Sandaa R-A *et al.* Seasonal Dynamics of Algae-Infecting  
621 Viruses and Their Inferred Interactions with Protists. *Viruses* 2019b;**11**, DOI:  
622 10.3390/v11111043.
- 623 Hingamp P, Grimsley N, Acinas SG *et al.* Exploring nucleo-cytoplasmic large DNA viruses in  
624 Tara Oceans microbial metagenomes. *ISME J* 2013;**7**:1678–95.
- 625 Ignacio-Espinoza JC, Ahlgren NA, Fuhrman JA. Long-term stability and Red Queen-like strain  
626 dynamics in marine viruses. *Nat Microbiol* 2020;**5**:265–71.
- 627 Johannessen TV, Bratbak G, Larsen A *et al.* Characterisation of three novel giant viruses reveals  
628 huge diversity among viruses infecting Prymnesiales (Haptophyta). *Virology*  
629 2015;**476**:180–8.

- 630 Johannessen TV, Larsen A, Bratbak G *et al.* Seasonal Dynamics of Haptophytes and dsDNA  
631 Algal Viruses Suggest Complex Virus-Host Relationship. *Viruses* 2017;**9**, DOI:  
632 10.3390/v9040084.
- 633 Katoh K, Standley DM. MAFFT multiple sequence alignment software version 7: improvements  
634 in performance and usability. *Mol Biol Evol* 2013;**30**:772–80.
- 635 Kuhlisch C, Schleyer G, Shahaf N *et al.* Viral infection of algal blooms leaves a halogenated  
636 footprint on the dissolved organic matter in the ocean. *bioRxiv* 2020:2020.09.08.287805.
- 637 Lehahn Y, Koren I, Schatz D *et al.* Decoupling physical from biological processes to assess the  
638 impact of viruses on a mesoscale algal bloom. *Curr Biol CB* 2014;**24**:2041–6.
- 639 Li Y, Hingamp P, Watai H *et al.* Degenerate PCR Primers to Reveal the Diversity of Giant  
640 Viruses in Coastal Waters. *Viruses* 2018;**10**:496.
- 641 Lima-Mendez G, Faust K, Henry N *et al.* Determinants of community structure in the global  
642 plankton interactome. *Science* 2015;**348**, DOI: 10.1126/science.1262073.
- 643 Martin-Platero AM, Cleary B, Kauffman K *et al.* High resolution time series reveals cohesive  
644 but short-lived communities in coastal plankton. *Nat Commun* 2018;**9**:266.
- 645 Matsen FA, Kodner RB, Armbrust EV. pplacer: linear time maximum-likelihood and Bayesian  
646 phylogenetic placement of sequences onto a fixed reference tree. *BMC Bioinformatics*  
647 2010;**11**:538.
- 648 Milici M, Deng Z-L, Tomasch J *et al.* Co-occurrence Analysis of Microbial Taxa in the Atlantic  
649 Ocean Reveals High Connectivity in the Free-Living Bacterioplankton. *Front Microbiol*  
650 2016;**7**, DOI: 10.3389/fmicb.2016.00649.
- 651 Moniruzzaman M, LeClerc GR, Brown CM *et al.* Genome of brown tide virus (AaV), the little  
652 giant of the Megaviridae, elucidates NCLDV genome expansion and host–virus  
653 coevolution. *Virology* 2014;**466–467**:60–70.
- 654 Nagasaki K, Tomaru Y, Tarutani K *et al.* Growth Characteristics and Intraspecies Host  
655 Specificity of a Large Virus Infecting the Dinoflagellate *Heterocapsa circularisquama*.  
656 *Appl Environ Microbiol* 2003;**69**:2580–6.
- 657 Needham DM, Chow C-ET, Cram JA *et al.* Short-term observations of marine bacterial and viral  
658 communities: patterns, connections and resilience. *ISME J* 2013;**7**:1274–85.
- 659 Needham DM, Fuhrman JA. Pronounced daily succession of phytoplankton, archaea and bacteria  
660 following a spring bloom. *Nat Microbiol* 2016;**1**:1–7.
- 661 Needham DM, Yoshizawa S, Hosaka T *et al.* A distinct lineage of giant viruses brings a  
662 rhodopsin photosystem to unicellular marine predators. *Proc Natl Acad Sci*  
663 2019:201907517.

- 664 Not F, Siano R, Kooistra WHCF *et al.* Chapter One - Diversity and Ecology of Eukaryotic  
665 Marine Phytoplankton. In: Piganeau G (ed.). *Advances in Botanical Research*. Vol 64.  
666 Academic Press, 2012, 1–53.
- 667 Oksanen J, Blanchet FG, Kindt R *et al.* *vegan: Community Ecology Package*. 2012.
- 668 Omura T, Iwataki M, Borja VM *et al.* *Marine Phytoplankton of The Western Pacific*.
- 669 Pagarete A, Chow C-ET, Johannessen T *et al.* Strong Seasonality and Interannual Recurrence in  
670 Marine Myovirus Communities. *Appl Environ Microbiol* 2013;**79**:6253–9.
- 671 Prodinge F, Endo H, Gotoh Y *et al.* An Optimized Metabarcoding Method for Mimiviridae.  
672 *Microorganisms* 2020;**8**:506.
- 673 Sakami T, Watanabe T, Kakehi S *et al.* Spatial variation of bacterial community composition at  
674 the expiry of spring phytoplankton bloom in Sendai Bay, Japan. *Gene* 2016;**576**:610–7.
- 675 Sandaa R-A, E. Storesund J, Olesin E *et al.* Seasonality Drives Microbial Community Structure,  
676 Shaping both Eukaryotic and Prokaryotic Host–Viral Relationships in an Arctic Marine  
677 Ecosystem. *Viruses* 2018;**10**, DOI: 10.3390/v10120715.
- 678 Santi I, Tsiola A, Dimitriou PD *et al.* Prokaryotic and eukaryotic microbial community responses  
679 to N and P nutrient addition in oligotrophic Mediterranean coastal waters: Novel insights  
680 from DNA metabarcoding and network analysis. *Mar Environ Res* 2019;**150**:104752.
- 681 Santini S, Jeudy S, Bartoli J *et al.* Genome of Phaeocystis globosa virus PgV-16T highlights the  
682 common ancestry of the largest known DNA viruses infecting eukaryotes. *Proc Natl*  
683 *Acad Sci U S A* 2013;**110**:10800–5.
- 684 Suttle CA. Marine viruses — major players in the global ecosystem. *Nat Rev Microbiol*  
685 2007;**5**:801–12.
- 686 Takahashi S, Tomita J, Nishioka K *et al.* Development of a Prokaryotic Universal Primer for  
687 Simultaneous Analysis of Bacteria and Archaea Using Next-Generation Sequencing.  
688 *PLOS ONE* 2014;**9**:e105592.
- 689 Tarutani K, Nagasaki K, Yamaguchi M. Viral Impacts on Total Abundance and Clonal  
690 Composition of the Harmful Bloom-Forming Phytoplankton *Heterosigma akashiwo*. *Appl*  
691 *Environ Microbiol* 2000;**66**:4916–20.
- 692 Teeling H, Fuchs BM, Becher D *et al.* Substrate-Controlled Succession of Marine  
693 Bacterioplankton Populations Induced by a Phytoplankton Bloom. *Science*  
694 2012;**336**:608–11.
- 695 Teeling H, Fuchs BM, Bennke CM *et al.* Recurring patterns in bacterioplankton dynamics during  
696 coastal spring algae blooms. *eLife* 2016;**5**, DOI: 10.7554/eLife.11888.

- 697 Tomaru Y, Tarutani K, Yamaguchi M *et al.* Quantitative and qualitative impacts of viral  
698 infection on a *Heterosigma akashiwo* (Raphidophyceae) bloom in Hiroshima Bay, Japan.  
699 *Aquat Microb Ecol* 2004;**34**:227–38.
- 700 Ward CS, Yung C-M, Davis KM *et al.* Annual community patterns are driven by seasonal  
701 switching between closely related marine bacteria. *ISME J* 2017;**11**:1412–22.
- 702 Yoshida T, Yuki Y, Lei S *et al.* Quantitative Detection of Toxic Strains of the Cyanobacterial  
703 Genus *Microcystis* by Competitive PCR. *Microbes Environ* 2003;**18**:16–23.
- 704 Zhang W, Zhou J, Liu T *et al.* Four novel algal virus genomes discovered from Yellowstone  
705 Lake metagenomes. *Sci Rep* 2015;**5**:15131.
- 706

707

|                    | Raw reads  | Reads     | Richness<br>all reads | Richness<br>per samples<br>subsampling | Average<br>richness<br>subsampling |
|--------------------|------------|-----------|-----------------------|----------------------------------------|------------------------------------|
| <b>NanoPlus</b>    | 3 613 399  | 3 001 267 | 3356                  | 52 – 253                               | 120 ± 51                           |
| <b>PicoNano</b>    | 2 692 119  | 2 180 138 | 4559                  | 115 – 410                              | 278 ± 68                           |
| <b>Prokaryotes</b> | 4 044 427  | 3 427 158 | 4478                  | 141 – 415                              | 275 ± 57                           |
| <b>Mimiviridae</b> | 45 106 746 | 5 712 580 | 6261                  | 108 – 394                              | 246 ± 72                           |

708

709



710 Table 1: Summary of generated datasets. The table contains read and ASV numbers for all  
711 datasets with >8000 reads. Singletons and unassigned ASVs were removed from datasets.  
712 Average richness is shown with one standard deviation.

713

714 Figure 1: Relative abundance of different eukaryotic lineages, prokaryotic phyla, and viral clades.  
715 Bar plots show relative read percentages of generated sequencing data for eukaryotic lineages of  
716 (A) NanoPlus and (B) PicoNano size fraction, and (C) daily cell count of HAB species. (D)  
717 Relative abundance of prokaryotic phyla. (E) Relative abundance of *Mimiviridae*. Colors in the  
718 background represent seasons (blue: winter, green: spring, red: summer, and yellow: fall).

719

720 Figure 2: NMDS ordination of different communities. Strong seasonality for every community  
721 was detected at station “j”. Samples clustered together according to sampling months. Different  
722 colors show different months, shapes represent years. Stress of the NMDS was between 0.09 and  
723 0.13 (prokaryotic NMDS: 0.09, PicoNano NMDS: 0.11, NanoPlus NMDS: 0.13, *Mimiviridae*  
724 NMDS: 0.11).

725

726 Figure 3: Dissimilarity metrics according to seasons. Violin plot shows dissimilarities of samples  
727 collected in opposite seasons (i.e., summer vs. winter or spring vs. fall). Communities were  
728 equally dissimilar between spring and fall as between summer and winter. Average Sørensen-  
729 Dice dissimilarity was lower between datasets from the same season (PicoNano:  $0.72 \pm 0.08$ ,  
730 NanoPlus:  $0.78 \pm 0.06$ , Prokaryotes:  $0.58 \pm 0.09$ , and *Mimiviridae*:  $0.78 \pm 0.11$ ; average  
731 dissimilarity  $\pm 1$  standard deviation) than between datasets from opposite seasons (PicoNano:  
732  $0.83 \pm 0.04$ , NanoPlus:  $0.89 \pm 0.04$ , Prokaryotes:  $0.77 \pm 0.09$ , and *Mimiviridae*:  $0.94 \pm 0.03$ ).

733

734 Figure 4: Sørensen-Dice dissimilarity metrics for the four different communities. (A–D) Dot  
735 plots showing pairwise dissimilarities of all samples plotted against sampling interval (days). (E–  
736 F) Boxplots showing dissimilarity and average dissimilarity of the four communities at three  
737 different time points.

738

739 Figure 5: Four most abundant ASVs of the subsampled datasets of each microbe-group and their  
740 taxonomic assignment. Eukaryotes are plotted in green and blue, prokaryotes in red, and  
741 *Mimiviridae* in purple. Eukaryotes are plotted in blue if their ASV was one of the four most  
742 abundant ASVs in both size fractions.

743

744 Figure 6: Recurrence of abundant ASVs. Line plots show number of samples in which abundant  
745 ASVs were present (i.e., recurrence). (A) Percentage of abundant ASVs and how often they were  
746 found. (B) Recurrence as indicated by absolute number of abundant ASVs and number of  
747 samples in which they were present. Most *Mimiviridae* ASVs were found in fewer than ten  
748 samples, while roughly half of all eukaryotic ASVs were found in fewer than ten samples. Most  
749 prokaryotic ASVs were found in more than half of all samples. An ASV was considered  
750 abundant if it generated at least 1% relative reads in one sample.

751

752 Figure 7: Schematic, visual representation of community memory model. (A) Seasonally  
753 dependent dissimilarity of one community over a longer sampling period with seasonal  
754 fluctuations (dark cyan) and fading community memory (grey). (B) Line plots showing changes  
755 in community dissimilarity over the short period represented in our datasets. *Mimiviridae*

756 communities (purple) were more dissimilar than were eukaryote (green) and prokaryote (red)  
757 communities.

758

759

760 Fig. S1: Cell counts, biotic, and abiotic data collected over 6 years. Blue dotted lines indicate  
761 sampling period during which amplicon sequencing was performed.

762

763 Fig. S2: Monthly and seasonal summary of cell counts, biotic, and abiotic data. (A–L) Boxplots  
764 showing monthly and seasonal biotic and abiotic data. (M) Bar plot showing monthly sum of  
765 daily cell counts throughout 6 years.

766

767 Fig. S3: Rarefaction curves of all samples. (A) Rarefaction curves for subsampled datasets. (B)  
768 Rarefaction curves for data without subsampling.

769

770 Fig. S4: Visualization of different diversity indices across all datasets subsampled at 8000 reads.  
771 (A) Shannon's diversity index; (B) Richness of different communities; (C) Pielou's evenness  
772 index.

773

774 Fig. S5: Phylogenetic tree with *Mimiviridae* ASV placements. Names of leaves correspond to  
775 known reference *Mimiviridae*. Unnamed leaves are PolB amino acid sequences assembled from  
776 metagenomic data. Red dots indicate placement of sequences generated from *Mimiviridae* PolB  
777 amplicon sequencing.

778

779 Fig. S6: Correlations of dissimilarity between different communities. All communities are  
780 statistically significantly correlated with each other ( $p < 10^{-4}$ ).

781

782 Fig. S7: Persistence of abundant ASVs in different microbial communities. (A) Percentage of  
783 abundant ASVs that were persistent (i.e., continually found in a series of samples). (B) Absolute  
784 number of abundant ASVs and their persistence.

785

786 Dataset S1: Microsoft Excel file contains environmental data and cell count data obtained from  
787 the Kochi Prefectural Fisheries Research Institute.

788

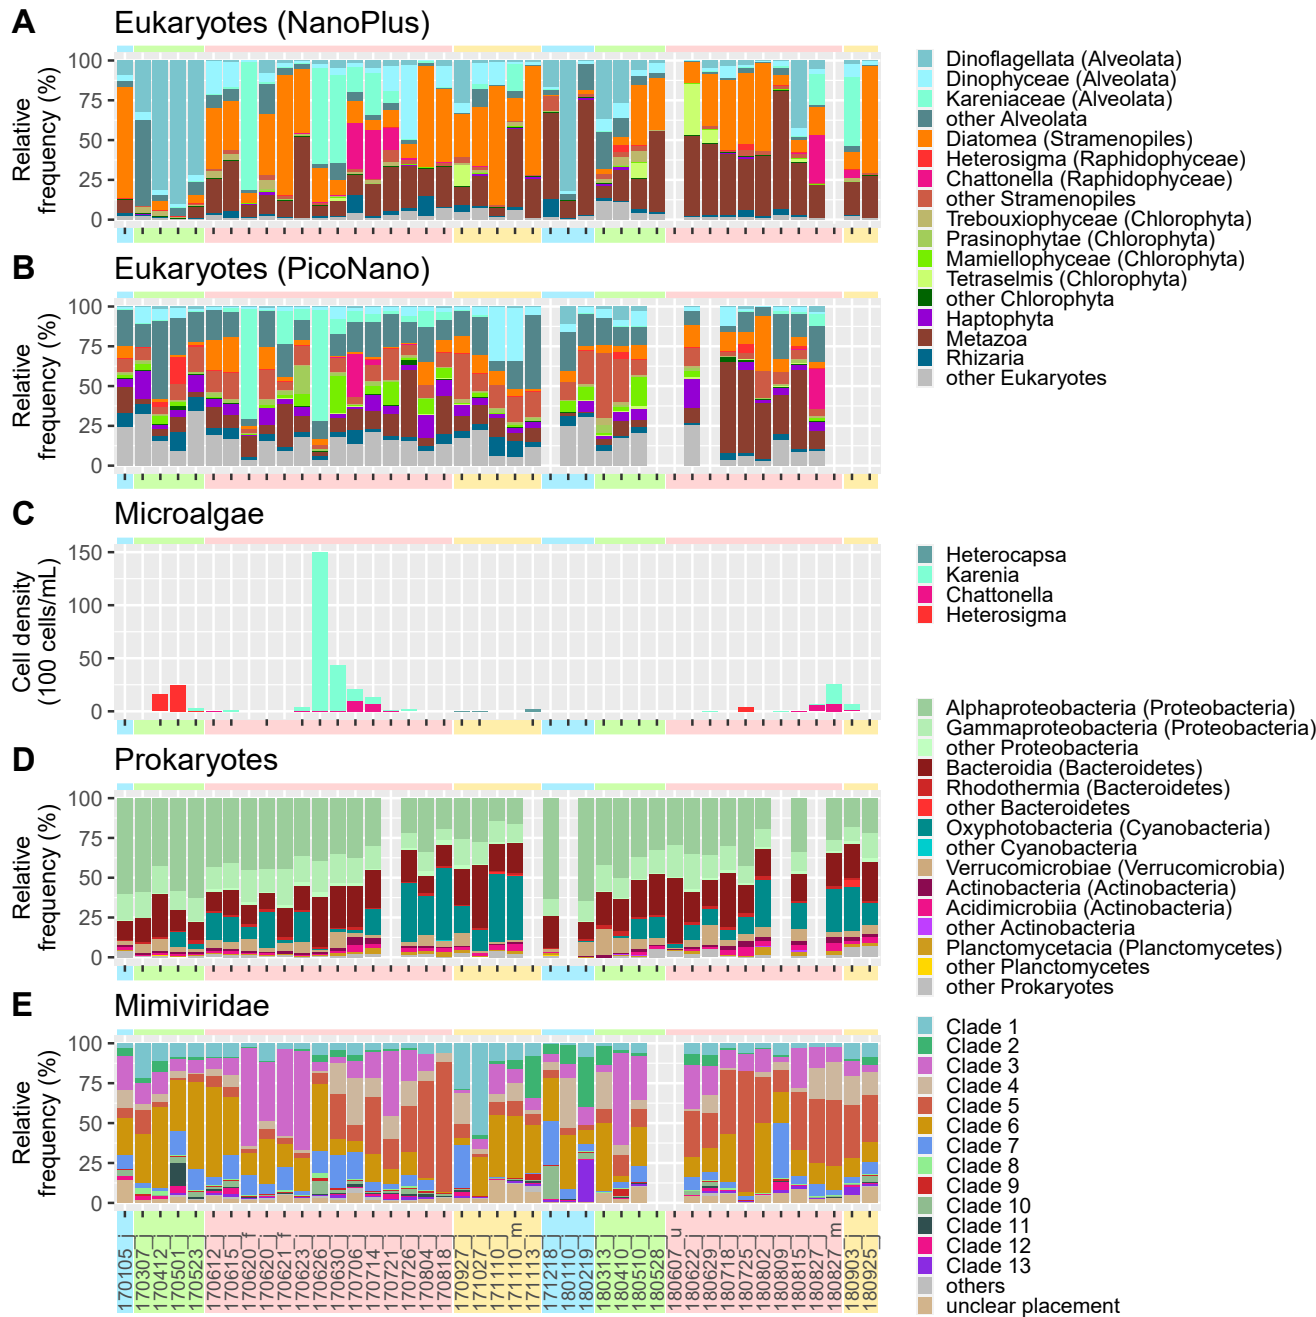

A

## Eukaryotes (NanoPlus)

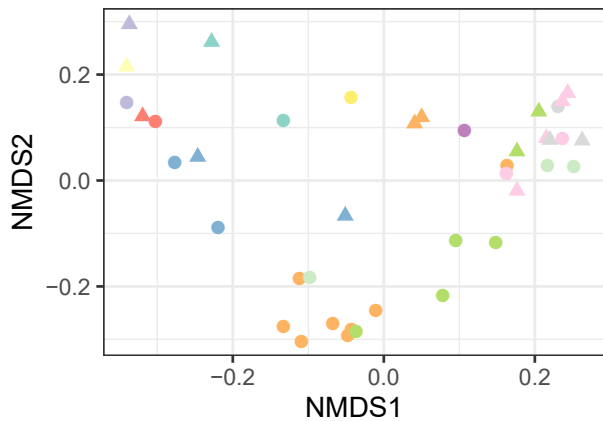

B

## Eukaryotes (PicoNano)

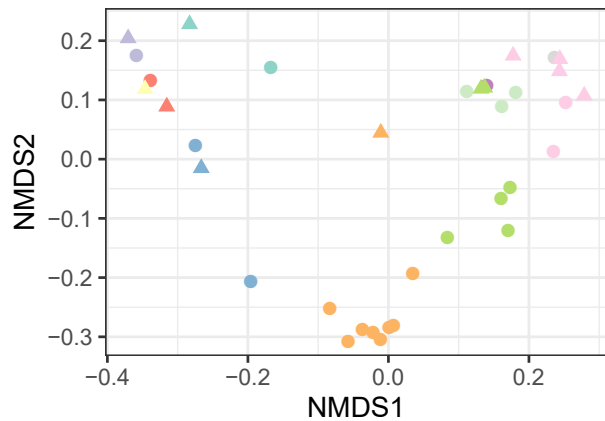

C

## Prokaryotes

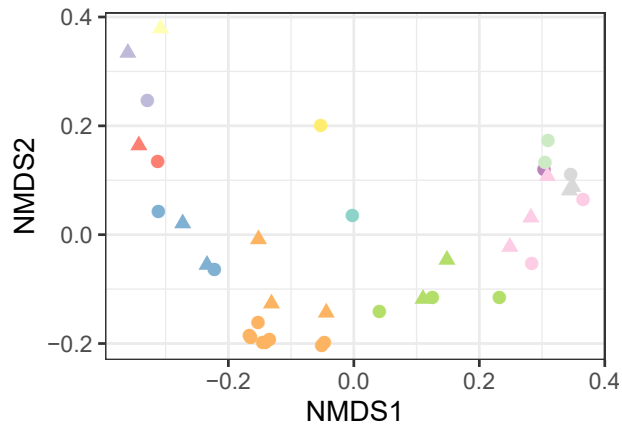

D

## Mimiviridae

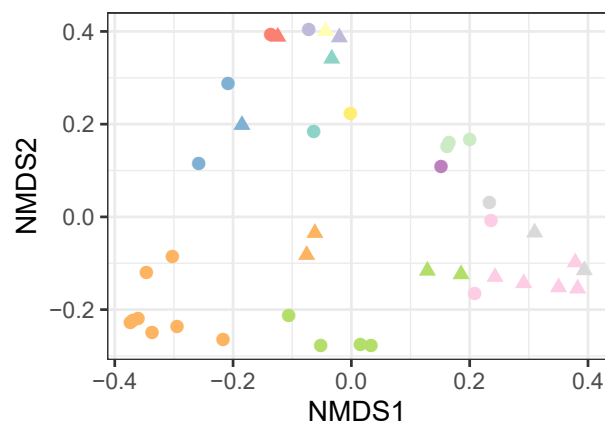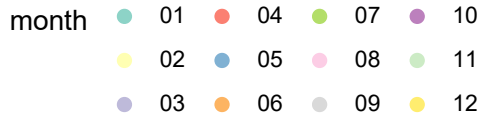

|      |        |        |
|------|--------|--------|
| year | ● 2017 | ▲ 2018 |
|------|--------|--------|

A

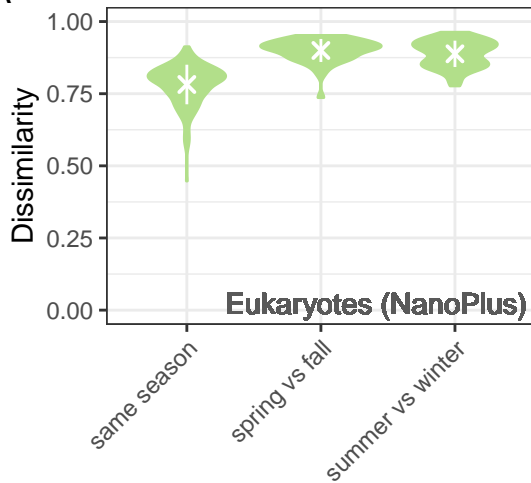

B

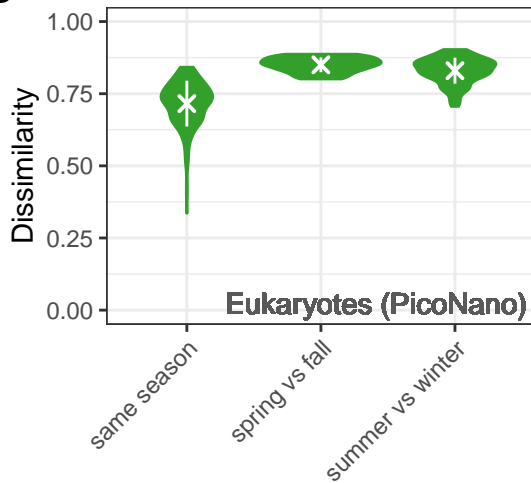

C

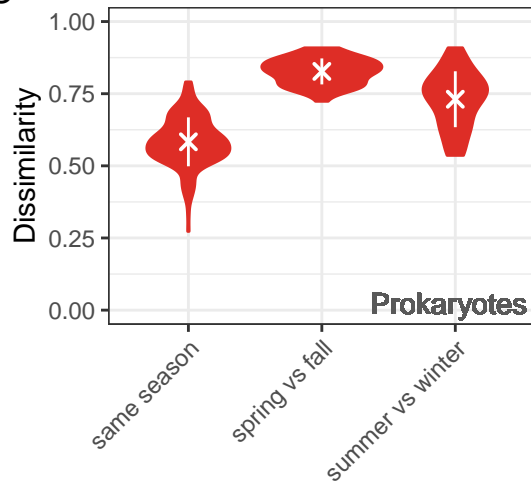

D

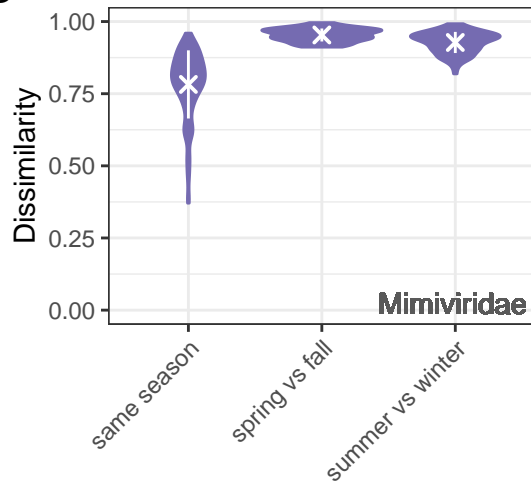

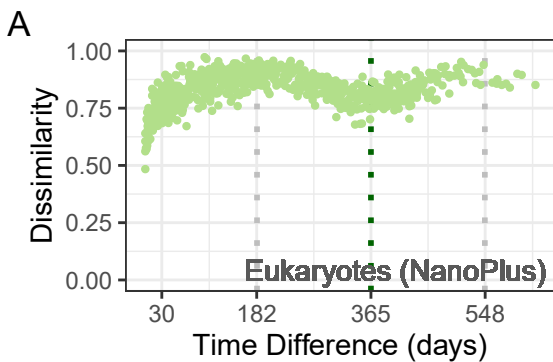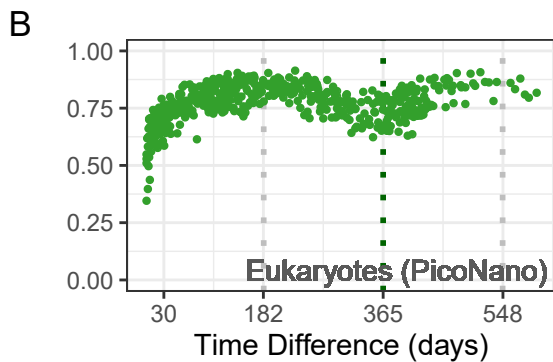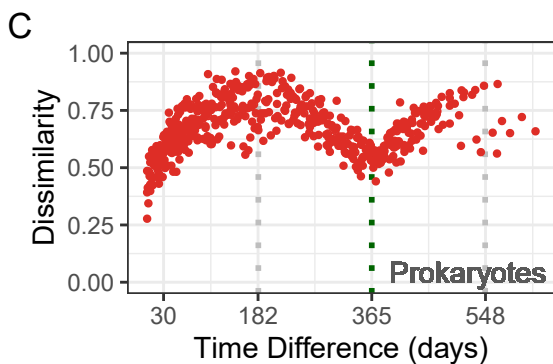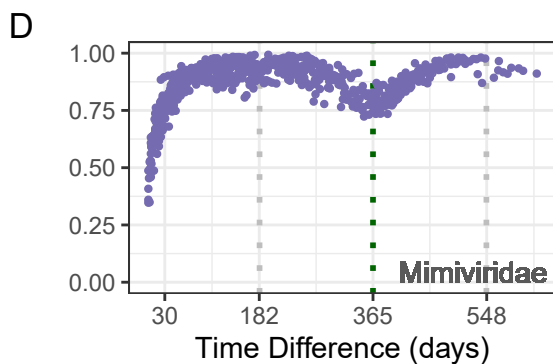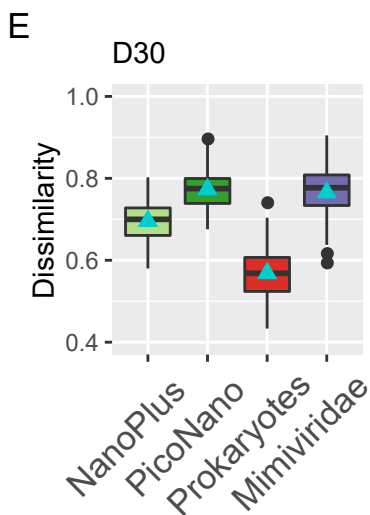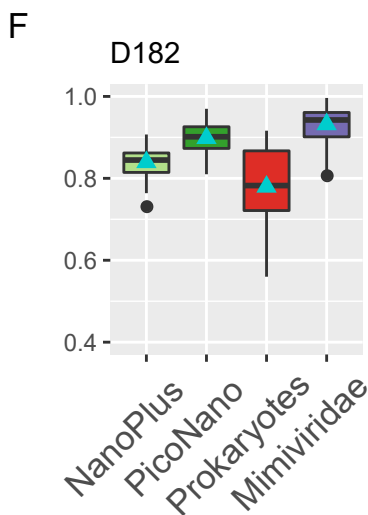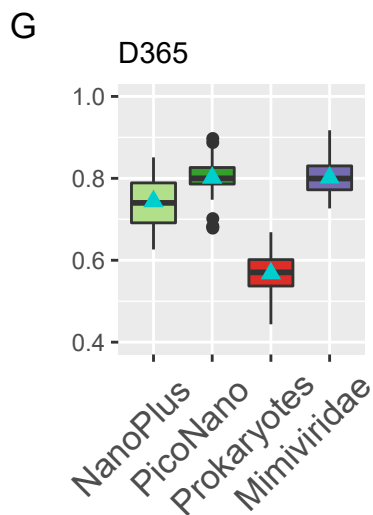



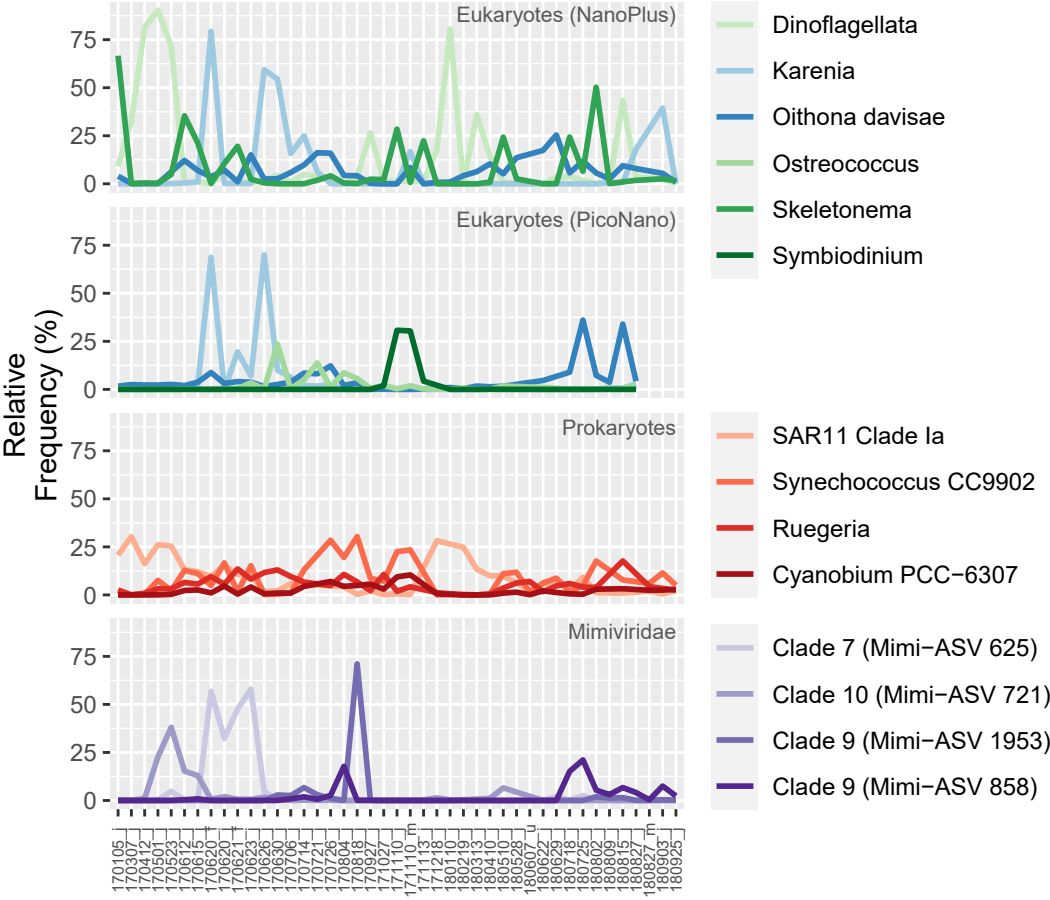

**A**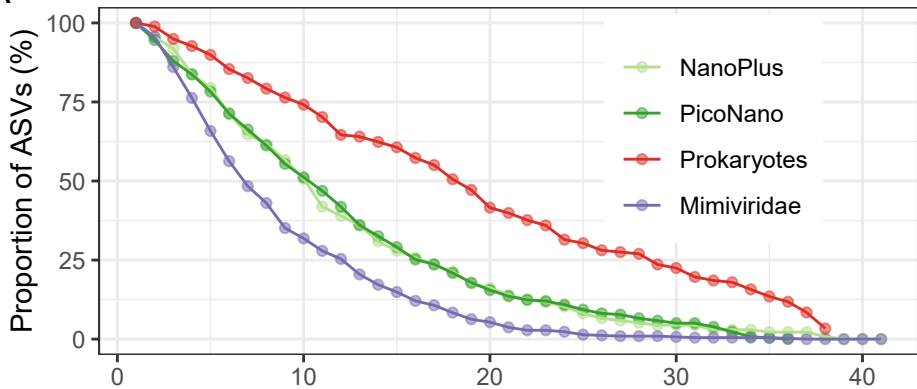**B**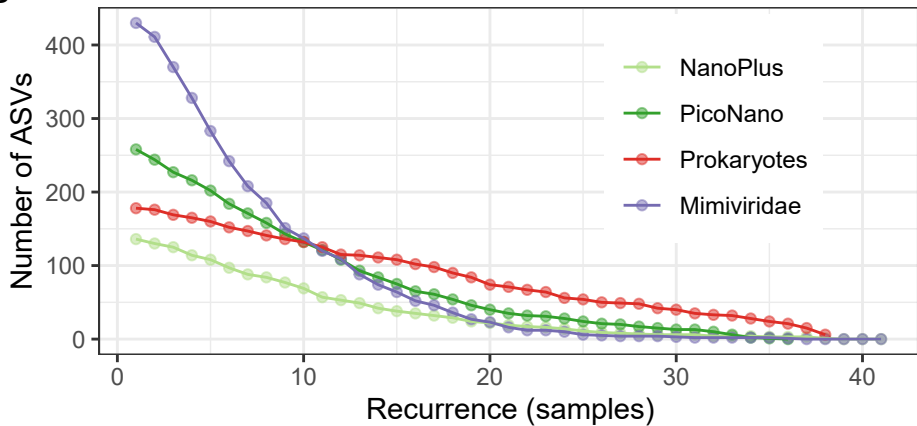

A

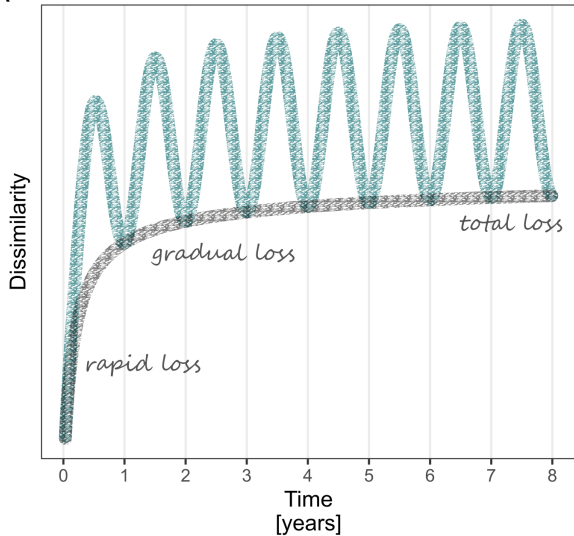

B

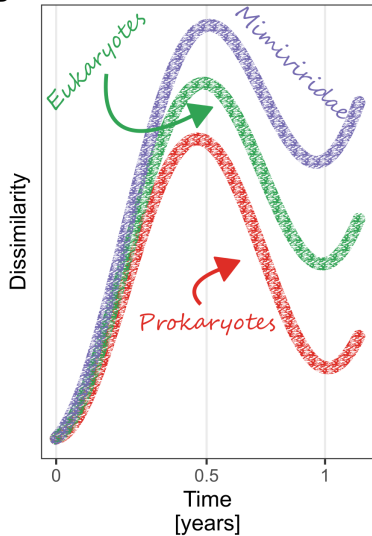

Source: https://www.biorxiv.org/content/10.1101/2021.02.02.429489v2.full.pdf
